# Supplementary material
Source: publisher figshare collection journal article supplement (https://karger.figshare.com/ndownloader/files/26378437)
Supplement: Supplementary file 1 [file 26378437]

| **Supplement table 1. List of primers used for RT-PCR analysis.** | |
| --- | --- |
| **Gene** | **Primer Sequence** (5`🡪3`) |
| TNF-α | (**F**) GAGGCCAAGCCCTGGTATG |
| (**R**) CGGGCCGATTGATCTCAGC |
| COX-2 | (**F**) CTGCGACTCCTTGACGTTGA |
| (**R**) GGTCGTGTAGCGGTGAAAGT |
| COL1A1 | (**F**) TCTGCGACAACGGCAAGGTG |
| (**R**) GACGCCGGTGGTTTCTTGGT |
| COL2A1 | (**F**) CCAGGGGTCGGAGAGAAAG |
| (**R**) GGTCCTGTGCCTATAACAATTCC |
| COL4A1 | (**F**) GCCCGGATGTCGCTTACAG |
| (**R**) AAATGCAGACGCAGGGTACAG |
| COL5A1 | (**F**) GACTGTGCCGACCCTGTAAC |
| (**R**)CCTGGACGACCACGTATGC |
| COK5A2 | (**F**) TAGGAACTGATGGTACTCCTGG |
| (**R**) GGCCTATCGGACCCTGAATAC |
| MMP2 | (**F**) TACAGGATCATTGGCTACACACC |
| (**R**) GGTCACATCGCTCCAGACT |
| MMP9 | (**F**) GGAGCGAGATCCCTCCAAAAT |
| (**R**) GGCTGTTGTCATACTTCTCATGG |

F: Forward primer. R: Reverse primer.
